# Supplementary material for: The Association between Visit-to-Visit Variability of Blood Pressure and the Risk of Metabolic Syndrome: The Moderating Effect of Weight
Source: Hindawi journal article supplement (doi:10.1155/2023/8156084), 2023-10-27
Supplement: f1 [file 8156084.f1.docx]

# Supplementary Table 1. STROBE checklist.

|  | Item No | Recommendation | Page No |
| --- | --- | --- | --- |
| **Title and abstract** | 1 | (*a*) Indicate the study’s design with a commonly used term in the title or the abstract | 1 |
| (*b*) Provide in the abstract an informative and balanced summary of what was done and what was found | 1 |
| Introduction | | | |
| Background/rationale | 2 | Explain the scientific background and rationale for the investigation being reported | 2 |
| Objectives | 3 | State specific objectives, including any prespecified hypotheses | 2 |
| Methods | | | |
| Study design | 4 | Present key elements of study design early in the paper | 3 |
| Setting | 5 | Describe the setting, locations, and relevant dates, including periods of recruitment, exposure, follow-up, and data collection | 3 |
| Participants | 6 | (*a*) Give the eligibility criteria, and the sources and methods of selection of participants. Describe methods of follow-up | 3-4 |
| (*b*)For matched studies, give matching criteria and number of exposed and unexposed | NA |
| Variables | 7 | Clearly define all outcomes, exposures, predictors, potential confounders, and effect modifiers. Give diagnostic criteria, if applicable | 4-5 |
| Data sources/ measurement | 8* | For each variable of interest, give sources of data and details of methods of assessment (measurement). Describe comparability of assessment methods if there is more than one group | 4-5 |
| Bias | 9 | Describe any efforts to address potential sources of bias | Ref 17-18 |
| Study size | 10 | Explain how the study size was arrived at | Ref 17-18 |
| Quantitative variables | 11 | Explain how quantitative variables were handled in the analyses. If applicable, describe which groupings were chosen and why | 4-5 |
| Statistical methods | 12 | (*a*) Describe all statistical methods, including those used to control for confounding | 5 |
| (*b*) Describe any methods used to examine subgroups and interactions | 5 |
| (*c*) Explain how missing data were addressed | 5(excluded) |
| (*d*) If applicable, explain how loss to follow-up was addressed | 5(excluded) |
| (*e*) Describe any sensitivity analyses | 5 |
| Results | | |  |
| Participants | 13* | (a) Report numbers of individuals at each stage of study—eg numbers potentially eligible, examined for eligibility, confirmed eligible, included in the study, completing follow-up, and analysed | 3  Fig 1 |
| (b) Give reasons for non-participation at each stage | Ref. 17-18  Fig 1 |
| (c) Consider use of a flow diagram | Fig 1 |
| Descriptive data | 14* | (a) Give characteristics of study participants (eg demographic, clinical, social) and information on exposures and potential confounders | 5-6  Table 1 |
| (b) Indicate number of participants with missing data for each variable of interest | Table 1 |
| (c) Summarise follow-up time (eg, average and total amount) | 5, Fig 1 |
| Outcome data | 15* | Report numbers of outcome events or summary measures over time | 5-7 |
| **Discussion** |  |  |  |
| Key results | 18 | Summarise key results with reference to study objectives | 7 |
| Limitations | 19 | Discuss limitations of the study, taking into account sources of potential bias or imprecision. Discuss both direction and magnitude of any potential bias | 8-9 |
| Interpretation | 20 | Give a cautious overall interpretation of results considering objectives, limitations, multiplicity of analyses, results from similar studies, and other relevant evidence | 7-9 |
| Generalisability | 21 | Discuss the generalisability (external validity) of the study results | 8-9 |
| **Other information** |  |  |  |
| Funding | 22 | Give the source of funding and the role of the funders for the present study and, if applicable, for the original study on which the present article is based | 9, There is no funders. |

STROBE Statement—Checklist of items that should be included in reports of cohort studies

*Give information separately for exposed and unexposed groups.

Note: An Explanation and Elaboration article discusses each checklist item and gives methodological background and published examples of transparent reporting. The STROBE checklist is best used in conjunction with this article (freely available on the Web sites of PLoS Medicine at http://www.plosmedicine.org/, Annals of Internal Medicine at http://www.annals.org/, and Epidemiology at http://www.epidem.com/). Information on the STROBE Initiative is available at http://www.strobe-statement.org.

# Supplementary Table 2. Other indices of Visit-to-visit variability of blood pressure and the risk of metabolic syndrome

| Visit-to-visit variability of blood pressure | No. of Cases/Total | Model 1a | Model 2b | Model 3c |
| --- | --- | --- | --- | --- |
| OR (95% CIs) | OR (95% CIs) | OR (95% CIs) |
| SBP-CV |  |  |  |  |
| Low (1st tertile, ≤0.054 mmHg) | 167/865 | 1 (Ref.) | 1 (Ref.) | 1 (Ref.) |
| Middle (2nd tertile, 0.054 to 0.093 mmHg) | 108/865 | 1.17 (0.93 - 1.49) | 1.19 (0.94 - 1.51) | 1.23 (0.95 - 1.59) |
| High (3rd tertile, ≥0.093 mmHg) | 234/864 | 1.55 (1.24 - 1.95) | 1.51 (1.19 - 1.90) | 1.51 (1.17 - 1.94) |
| SBP-RMSE |  |  |  |  |
| Low (1st tertile, ≤4.355 mmHg) | 171/866 | 1 (Ref.) | 1 (Ref.) | 1 (Ref.) |
| Middle (2nd tertile, 4.355 to 10.070 mmHg) | 201/868 | 1.22 (0.97 - 1.54) | 1.19 (0.94 - 1.50) | 1.18 (0.92 - 1.53) |
| High (3rd tertile, ≥10.070 mmHg) | 219/860 | 1.39 (1.11 - 1.74) | 1.30 (1.03 - 1.65) | 1.31 (1.02 - 1.69) |
| SBP-ASV |  |  |  |  |
| Low (1st tertile, ≤7.667 mmHg) | 149/868 | 1 (Ref.) | 1 (Ref.) | 1 (Ref.) |
| Middle (2nd tertile, 7,667 to 14.167 mmHg) | 213/862 | 1.58 (1.25 - 2.00) | 1.58 (1.25 - 2.01) | 1.65 (1.27 - 2.14) |
| High (3rd tertile, ≥14.167 mmHg) | 229/864 | 1.74 (1.38 - 2.20) | 1.63 (1.28 - 2.08) | 1.63 (1.25 - 2.12) |
| DBP-CV | |  |  |  |
| Low (1st tertile, ≤0.060 mmHg) | 185/865 | 1 (Ref.) | 1 (Ref.) | 1 (Ref.) |
| Middle (2nd tertile, 0.060 to 0.100 mmHg) | 204/865 | 1.13 (0.90 - 1.42) | 1.14 (0.90 - 1.43) | 1.10 (0.85 - 1.41) |
| High (3rd tertile, ≥0.100 mmHg) | 202/864 | 1.12 (0.89 - 1.41) | 1.20 (0.95 - 1.51) | 1.27 (0.99 -1.64) |
| DBP-RMSE |  |  |  |  |
| Low (1st tertile, ≤2.858 mmHg) | 171/866 | 1 (Ref.) | 1 (Ref.) | 1 (Ref.) |
| Middle (2nd tertile, 2.858 to 6.668 mmHg) | 222/864 | 1.41 (1.12 - 1.76) | 1.38 (1.10 - 1.74) | 1.44 (1.12 - 1.86) |
| High (3rd tertile, ≥6.668 mmHg) | 198/864 | 1.21 (0.96 - 1.52) | 1.17 (0.92 - 1.48) | 1.26 (0.98 - 1.63) |
| DBP-ASV |  |  |  |  |
| Low (1st tertile, ≤5.167 mmHg) | 186/866 | 1 (Ref.) | 1 (Ref.) | 1 (Ref.) |
| Middle (2nd tertile, 5.167 to 9.00 mmHg) | 196/868 | 1.07 (0.85 - 1.34) | 1.05 (0.83 - 1.32) | 1.04 (0.80 - 1.33) |
| High (3rd tertile, ≥9.00 mmHg) | 209/860 | 1.17 (0.94 - 1.47) | 1.16 (0.92 - 1.45) | 1.24 (0.97 - 1.60) |

OR, odds ratio; CIs, confidence intervals; VVV, visit-to-visit variability; SBP, systolic blood pressure; DBP, diastolic blood pressure; CV, coefficient of variation; RMSE, root mean square error; ASV, average successive variability;

a Model 1: unadjusted.

b Model 2: adjusted for age, gender, baseline systolic blood pressure and diastolic blood pressure.

c Model 3: Model 2 plus smoking, drinking, baseline value of waist circumference, blood urea nitrogen, fasting plasma glucose, HbA1c, total cholesterol, triglycerides, high-density lipoprotein cholesterol, low-density lipoprotein cholesterol, creatinine, uric acid, C reactive protein, use of antihypertensive drugs, lipid-lowering drugs and antidiabetic drugs.

# Supplementary Table 3. Sensitivity analyses

|  | MetS数/  总人数 | Model 1a | Model 2b | Model 3c |
| --- | --- | --- | --- | --- |
| **OR (95% CIs)** | **OR (95% CIs)** | **OR (95% CIs)** |
| **Excluding participants with stroke (n=35)** | | |  |  |
| **SBP-SD** | |  |  |  |
| Low | 158/858 | 1 (Ref.) | 1 (Ref.) | 1 (Ref.) |
| Middle | 185/854 | 1.23 (0.97 - 1.55) | 1.25 (0.98 - 1.59) | 1.30 (1.00 - 1.69) |
| High | 236/847 | 1.71 (1.36 - 2.15) | 1.63 (1.28 - 2.08) | 1.70 (1.31 - 2.01) |
| **DBP-SD** | |  |  |  |
| Low | 170/855 | 1 (Ref.) | 1 (Ref.) | 1 (Ref.) |
| Middle | 199/854 | 1.22 (0.97 - 1.54) | 1.19 (0.94 - 1.50) | 1.20 (0.93 - 1.56) |
| High | 210/850 | 1.32 (1.05 - 1.66) | 1.31 (1.04 - 1.66) | 1.45 (1.12 - 1.87) |
| **Excluding participants with arthritis or rheumatism (n=896)** | | | |  |
| **SBP-SD** | |  |  |  |
| Low | 101/566 | 1 (Ref.) | 1 (Ref.) | 1 (Ref.) |
| Middle | 114/567 | 1.16 (0.86 - 1.56) | 1.17 (0.87 - 1.58) | 1.26 (0.91 - 1.76) |
| High | 158/563 | 1.79 (1.35 - 2.37) | 1.70(1.26 - 2.29) | 1.84 (1.33 - 2.54) |
| **DBP-SD** | |  |  |  |
| Low | 111/566 | 1 (Ref.) | 1 (Ref.) | 1 (Ref.) |
| Middle | 131/566 | 1.23 (0.93 - 1.64) | 1.21 (0.91 - 1.61) | 1.32 (0.97 - 1.82) |
| High | 131/566 | 1.23 (0.93 - 1.64) | 1.19 (0.89 - 1.59) | 1.41 (0.97 - 1.85) |
| **Excluding participants with kidney diseases (n=168)** | | |  |  |
| **SBP-SD** | |  |  |  |
| Low | 148/809 | 1 (Ref.) | 1 (Ref.) | 1 (Ref.) |
| Middle | 180/809 | 1.28 (1.01 - 1.63) | 1.31 (1.02 - 1.67) | 1.36 (1.04 - 1.78) |
| High | 228/808 | 1.76 (1.35 - 2.22) | 1.60 (1.32 - 2.17) | 1.73 (1.32 – 2.26) |
| **DBP-SD** |  |  |  |  |
| Low | 166/809 | 1 (Ref.) | 1 (Ref.) | 1 (Ref.) |
| Middle | 186/810 | 1.15 (0.91 - 1.46) | 1.12 (0.88 - 1.42) | 1.15 (0.88 - 1.49) |
| High | 204/807 | 1.31 (1.04 - 1.66) | 1.29 (1.02 - 11.64) | 1.41 (1.11 - 1.87) |
| **Excluding participants with** **digestive diseases (n=621)** | | |  |  |
| **SBP-SD** |  |  |  |  |
| Low | 142/658 | 1 (Ref.) | 1 (Ref.) | 1 (Ref.) |
| Middle | 140/658 | 1.13 (0.86 - 1.48) | 1.13 (0.86 - 1.49) | 1.16 (0.86 - 1.56) |
| High | 189/657 | 1.69 (1.31 - 2.28) | 1.57 (1.20 - 2.07) | 1.66 (1.24 - 2.22) |
| **DBP-SD** |  |  |  |  |
| Low | 140/658 | 1 (Ref.) | 1 (Ref.) | 1 (Ref.) |
| Middle | 153/658 | 1.12 (0.86 - 1.45) | 1.09 (0.83 - 1.41) | 1.10 (0.83 - 1.48) |
| High | 163/657 | 1.22 (0.94 -1.58) | 1.17 (0.90 - 1.52) | 1.34 (1.01 - 1.79) |
|  |  |  |  |  |
| **Excluding participants with** **asthma (n=104)** | | |  |  |
| **SBP-SD** |  |  |  |  |
| Low | 156/832 | 1 (Ref.) | 1 (Ref.) | 1 (Ref.) |
| Middle | 176/828 | 1.16 (0.92 - 1.49) | 1.20 (0.94 - 1.53) | 1.24 (0.95 - 1.61) |
| High | 234/830 | 1.70 (1.35 - 2.14) | 1.62 (1.27 - 2.07) | 1.67 (1.29 - 2.18) |
| **DBP-SD** |  |  |  |  |
| Low | 168/830 | 1 (Ref.) | 1 (Ref.) | 1 (Ref.) |
| Middle | 189/830 | 1.16 (0.92 - 1.47) | 1.13 (0.89 - 1.43) | 1.17 (0.90 - 1.51) |
| High | 209/830 | 1.33 (1.05 -1.67) | 1.31 (1.03 - 1.66) | 1.44 (1.11 - 1.86) |

OR, odds ratio; CIs, confidence intervals; VVV, visit-to-visit variability; SBP, systolic blood pressure; SD, standard division; DBP, diastolic blood pressure;

a Model 1: unadjusted.

b Model 2: adjusted for baseline age, gender, history of smoking (yes or no) and drinking (yes or no).

c Model 3: Model 2 plus baseline value of body mass index, waist circumference, fasting plasma glucose, systolic blood pressure, diastolic blood pressure, total cholesterol, triglycerides, high-density lipoprotein cholesterol, low-density lipoprotein cholesterol, uric acid, blood urea nitrogen, use of antihypertensive drugs, lipid-lowering drugs and antidiabetic drugs

# Supplementary Table 4. Pearson analysis between different VVV-BP indices

|  | SBP-SD | SBP-CV | SBP-ASV | SBP-RMSE | DBP-SD | DBP-CV | DBP-ASV | DBP-RMSE |
| --- | --- | --- | --- | --- | --- | --- | --- | --- |
| SBP-SD | / |  |  |  |  |  |  |  |
| SBP-CV | 0.973*** | / |  |  |  |  |  |  |
| SBP-ASV | 0.909*** | 0.896*** | / |  |  |  |  |  |
| SBP-RMSE | 0.747*** | 0.739*** | 0.925*** | / |  |  |  |  |
| DBP-SD | 0.561*** | 0.569*** | 0.518*** | 0.437*** | / |  |  |  |
| DBP-CV | 0.509*** | 0.553*** | 0.479*** | 0.406*** | 0.969*** | / |  |  |
| DBP-ASV | 0.509*** | 0.519*** | 0.568*** | 0.548*** | 0.902*** | 0.878*** | / |  |
| DBP-RMSE | 0.404*** | 0.413*** | 0.521*** | 0.562*** | 0.731*** | 0.710*** | 0.921*** | / |
| VVV-BP, visit-to-visit variability of blood pressure; SBP, systolic blood pressure; DBP, diastolic blood pressure; SD, standard division; CV, coefficient of variation; ASV, average successive variability; RMSE, root mean square error;  ****P* < 0.0001 | | | | | | | | |
